# Supplementary material
Source: publisher figshare collection journal article supplement (https://gsapubs.figshare.com/articles/dataset/_/12533603)
Supplement: Supplementary file 1 [file 1]

## Sheet: Table DR1
Supplementary Data Table DR1. Monazite U-Th/Pb Geochronology
		Pb	U	Th	Th/U		2σ		2σ		2σ			2σ	206Pb/238U	2σ.	208Pb/232Th	2σ.		Ca	Sr	Y	La	Ce	Pr	Nd	Sm	Eu	Gd	Tb	Dy	Ho	Er	Tm	Yb	Lu
Analysis*	Domain	(ppm)	(ppm)	(ppm)		207Pb/206Pb	(%)	207Pb/235U	(%)	206Pb/238U	(%)	Rho	208Pb/232Th	(%)	(Ma)	abs.†	(Ma)	abs.		(ppm)	(ppm)	(ppm)	(ppm)	(ppm)	(ppm)	(ppm)	(ppm)	(ppm)	(ppm)	(ppm)	(ppm)	(ppm)	(ppm)	(ppm)	(ppm)	(ppm)
JD46B_8_1	3	41.07	7790	18030	2.28885	0.05217	2.11787	0.03129	2.9417	0.004337	2.04162	0.50184	0.001468	2.55248	27.9	0.569613	29.64	0.756555		7910	57	1850	55200	109000	12000	45200	6600	660	4460	280	420	33	43	1.86	8.2	0.77
JD46B_8_2	3	45.06	8890	20190	2.27169	0.05106	2.09942	0.03065	2.9528	0.004307	2.07641	0.57234	0.001452	2.59562	27.71	0.575372	29.33	0.761296		9900	67.3	1500	56400	125000	14500	50300	7160	794	4810	226	380	25.5	28	1.55	5.3	0.44
JD46B_8_3	4	42.56	7662	19590	2.52525	0.05119	2.25221	0.03041	3.16288	0.004221	2.22066	0.59414	0.001409	2.78233	27.15	0.60291	28.47	0.792129		8530	54.8	5000	59800	113000	12200	49200	7660	699	5120	470	950	108	126	10.6	30	2.17
JD46B_8_4	2	50.79	6290	20770	3.36247	0.05331	2.37263	0.03559	3.20901	0.004752	2.16064	0.54479	0.001589	2.56644	30.56	0.660291	32.09	0.823569		9030	70.1	1970	56400	113300	14310	50600	7190	829	5850	414	738	50.7	39.8	1.87	5.7	0.39
JD46B_8_5	4	31.87	5450	17100	3.1736	0.0515	2.61001	0.02601	3.42604	0.003641	2.21936	0.55811	0.001224	2.64625	23.43	0.519996	24.72	0.654153		8800	36.1	10820	50800	104300	12600	43500	7220	807	7250	821	2720	297	341	26.7	92.3	5.12
JD46B_8_6	2	44.64	8870	19760	2.24266	0.05075	2.1057	0.03149	2.91906	0.004451	2.02161	0.59421	0.001474	2.48398	28.63	0.578786	29.78	0.739729		9030	77	660	65100	114000	13100	47300	7290	703	4450	221	222	10.69	16.9	0.62	2.7	0.302
JD46B_8_7	2	45.47	9350	19770	2.14087	0.05118	2.02994	0.03254	2.97537	0.004546	2.17535	0.6634	0.001508	2.6037	29.24	0.636073	30.46	0.793087		9900	75.9	740	57600	125000	13500	44300	6700	869	4890	280	368	18.5	17.3	0.68	3.38	0.33
JD46B_8_8	2	54.1	4980	21540	4.3802	0.0528	2.41599	0.03682	3.18218	0.005019	2.07105	0.45299	0.001645	2.4571	32.28	0.668534	33.23	0.816494		8660	56.1	2600	62600	119800	14600	44900	7490	822	6060	494	1118	72.8	53.6	2.11	5.8	0.32
JD46B_8_9	2	44.34	4630	17510	3.84615	0.0545	2.5147	0.0376	3.25988	0.004999	2.07439	0.56127	0.001653	2.54046	32.15	0.666917	33.39	0.848261		7400	43.4	2790	53600	113000	11100	40000	6630	671	5120	481	1150	84	57.9	2.9	6.2	0.61
JD46B_8_10	2	46.99	8130	19590	2.48139	0.05112	1.99193	0.03341	2.83794	0.004695	2.02141	0.655	0.001561	2.4548	30.19	0.610264	31.52	0.773751		8900	74.1	1180	59700	130000	12700	45400	7670	828	5120	356	498	24.9	20.7	0.99	3.52	0.42
JD46B_8_11	2	37.68	6480	15620	2.47463	0.05572	2.17813	0.03679	3.1482	0.004769	2.27308	0.7393	0.00159	2.70411	30.67	0.697155	32.11	0.86829		7900	67.9	705	50200	116200	11100	37700	6190	736	4410	281	398	18.1	16.3	0.81	2.99	0.32
JD46B_8_12	2	49.24	5103	19680	3.94011	0.0524	2.38259	0.03582	3.18122	0.004882	2.10795	0.59982	0.00162	2.58539	31.39	0.661685	32.72	0.845939		8460	48.9	2470	60400	127000	13400	43300	7110	784	5590	486	1065	69.7	53.2	2.28	6.1	0.53
JD46B_8_13	2	53.1	4900	20930	4.32713	0.05023	2.41392	0.03481	3.20297	0.00497	2.10523	0.49173	0.001646	2.57419	31.96	0.672832	33.24	0.855659		9090	52.8	3620	59300	120700	14000	44800	7120	748	6590	510	1232	101.8	77	3.78	8.9	0.76
JD46B_8_14	2	46.16	4451	18100	4.14714	0.05303	2.26502	0.03666	3.1586	0.00496	2.20146	0.63235	0.001651	2.57209	31.89	0.702046	33.35	0.857791		7850	49.5	2770	68600	124700	12700	40900	7240	700	5700	485	1094	69.6	54.9	2.68	6.5	0.52
JD46B_8_15	2	40.12	4466	15630	3.56252	0.0543	2.52067	0.03752	3.34326	0.004985	2.19626	0.52162	0.00167	2.6278	32.05	0.703902	33.73	0.886357		6660	52.6	2500	64500	121000	12930	44300	6360	636	5390	436	890	66.7	53	1.92	6.09	0.51
JD46B_8_16	3	27.6	4870	12390	2.59471	0.0541	2.38048	0.03157	3.26122	0.004188	2.2291	0.52474	0.001451	2.67186	26.94	0.600519	29.31	0.783123		5780	40.4	3430	37700	78000	8500	33400	5080	470	4580	332	847	71.4	58.2	3.47	9.6	0.62
JD46B_1_17	1	37.93	5117	14620	2.89436	0.05253	2.30593	0.03773	3.19397	0.005182	2.21001	0.60513	0.001676	2.53179	33.32	0.736374	33.85	0.857011		6570	40.2	12720	59200	116900	12750	47400	7470	723	6560	737	2530	338	444	31.4	96.7	5.92
JD46B_1_18§		49.68	3080	7020	2.29938	0.05379	2.06065	0.107	5.80734	0.01407	5.42945	0.95404	0.00478	5.48176	90.5	4.91365	96.3	5.27893		4710	36.6	10040	65400	132000	13000	44700	7850	826	6180	696	2370	269	375	32.8	84.5	5.51
JD46B_1_19		35.09	6140	15100	2.49813	0.05566	2.19244	0.0363	3.40628	0.004713	2.6069	0.81501	0.001489	2.72726	30.31	0.790151	30.06	0.819815		20600	49.2	7330	57200	116300	11310	40500	6880	653	5250	517	1500	169	236	18.3	46.1	3.63
JD46B_1_20		80.8	4402	8570	1.97902	0.05465	1.72003	0.1523	2.91195	0.02034	2.34967	0.89451	0.00606	2.7501	129.8	3.04988	122.1	3.35787		4960	50.2	12390	68300	125600	12650	44600	8890	921	7750	836	2910	328	466	39.9	130	7.84
JD46B_1_21	2	39.78	8520	16790	2.002	0.0511	2.15408	0.03255	2.97098	0.004626	2.04613	0.66279	0.001523	2.56213	29.75	0.608723	30.75	0.787854		8720	70.2	2060	57700	112200	11900	42800	6210	671	4880	294	578	52	65	4.15	12.3	0.84
JD46B_1_22		55.4	5863	11470	1.97161	0.05446	2.03631	0.0819	5.0017	0.01075	4.56842	0.9595	0.00308	4.75972	68.9	3.14764	62.2	2.96055		6020	58.5	7300	56200	114400	12240	44700	7900	891	7160	620	1800	212	265	23.3	84	5.6
JD46B_1_23	3	43.34	8610	19150	2.25023	0.05073	2.12	0.03022	2.99178	0.004357	2.11102	0.68388	0.001447	2.63557	28.02	0.591507	29.22	0.770112		8980	77.4	890	60400	123600	13490	50600	7110	679	4690	217	295	23.1	25.5	1.27	3	0.28
JD46B_1_24	4	17.74	3570	8990	2.54453	0.0715	2.46656	0.03672	3.37404	0.003685	2.30222	0.55149	0.001274	2.61461	23.71	0.545856	25.74	0.673002		4890	25	6740	34100	69400	6480	26000	4290	472	4230	455	1520	178	218	15.7	47.4	2.01
JD46B_1_25	4	35.34	7300	17800	2.46427	0.05166	2.22649	0.02736	3.16562	0.003855	2.2503	0.55049	0.001279	2.65458	24.8	0.558075	25.83	0.685679		8900	41.4	9870	52300	113000	11400	39200	7050	674	6220	674	2080	233	273	20	57	2.61
JD46B_4_26	2	47.6	5330	18970	3.62188	0.05104	2.19798	0.03511	3.11591	0.004992	2.20858	0.64372	0.001609	2.62361	32.1	0.708953	32.5	0.852675		7430	49.9	1940	60200	128700	13020	46200	7870	819	5870	485	861	48.4	42.3	1.59	4.4	0.67
JD46B_4_27	2	47.8	4601	18550	4.06669	0.05116	2.3568	0.03538	3.18039	0.00502	2.1355	0.51693	0.00165	2.54162	32.28	0.68934	33.33	0.847122		7920	36.9	2800	52100	110100	12890	45200	7050	756	6380	563	1238	82.1	56.4	2.15	4.6	0.42
JD46B_4_28	2	51	5015	20410	4.15455	0.05121	2.2372	0.03525	3.15748	0.00503	2.22815	0.65261	0.00161	2.62313	32.35	0.720807	32.52	0.853042		7650	46.9	1950	58200	110100	12160	46900	7650	760	6530	514	870	51.1	40.4	1.41	4.4	0.65
JD46B_12_29	2	52.2	7350	21600	2.98775	0.05343	2.06719	0.03467	2.82743	0.004733	1.92901	0.60313	0.001561	2.42705	30.44	0.587192	31.53	0.76525		8100	84.9	1585	58300	106300	12030	46600	7270	723	5410	347	575	40	38	1.73	4.1	0.35
JD46B_12_30	2	42.1	4710	16920	3.63029	0.05481	2.26474	0.03691	3.09444	0.004878	2.10868	0.50243	0.00161	2.52649	31.37	0.661494	32.51	0.821362		6460	57.2	731	65100	123000	13700	46200	7560	755	5440	344	462	20.5	17	0.88	3.2	0.18
JD46B_12_31	2	47.16	9970	19970	2.04207	0.05259	2.01809	0.03336	2.79437	0.004611	1.93283	0.62729	0.001529	2.46499	29.66	0.573278	30.88	0.761189		8990	99.3	1103	60000	112300	12030	46100	7370	764	4570	270	330	20.4	29.8	1.26	5	0.5
JD46B_12_32	2	45.95	5000	18330	3.72703	0.0544	2.37257	0.03707	3.07004	0.004947	1.94835	0.5129	0.001622	2.41103	31.81	0.61977	32.76	0.789853		7140	60.9	950	58800	127600	13660	47500	7370	733	5510	355	503	27.2	21.2	0.75	3.7	0.24
JD46B_12_33	2	47.8	9660	20840	2.19587	0.0513	2.04096	0.03204	2.80183	0.004526	1.91957	0.58808	0.001482	2.45063	29.11	0.558786	29.92	0.733228		9150	83.8	335	59600	126000	12690	47300	7820	723	4170	158	136	5.77	11.5	0.48	1.65	0.28
JD46B_12_34	2	46.37	5430	18730	3.5137	0.05243	2.20869	0.03554	3.0265	0.004878	2.06915	0.52566	0.001592	2.50287	31.37	0.649092	32.16	0.804923		7150	67.9	965	57500	109500	13270	49600	7460	698	5900	375	477	25.7	21.3	0.7	2.37	0.55
JD46B_3_35	2	30.87	5260	12490	2.44798	0.0568	2.59102	0.0367	3.56161	0.004656	2.44371	0.57582	0.001603	2.92914	29.94	0.731646	32.37	0.948163		6150	47.9	2540	42600	87300	9000	31300	5060	505	3300	240	750	86	126	10.9	41.5	2.68
JD46B_3_36	1	28.04	4540	10500	2.38265	0.0609	2.88386	0.0412	3.72686	0.004897	2.36069	0.3262	0.001727	2.80314	31.49	0.743381	34.88	0.977734		5600	38.1	4920	42400	81000	8500	29200	5010	477	3440	351	1148	143.3	197	18.9	62.4	3.97
JD46B_3_37	3	27.81	6059	12170	2.06356	0.0578	2.849	0.03386	3.56347	0.00422	2.14045	0.55164	0.001457	2.66832	27.14	0.580918	29.44	0.785555		5760	47.8	2820	44500	87000	8460	34900	5240	547	4140	287	585	55.6	53.6	2.89	7.8	0.58
JD46B_3_38	1	21.58	2986	8010	2.76243	0.0629	3.66012	0.0439	4.46018	0.00504	2.54887	0.48267	0.001766	2.92346	32.4	0.825835	35.67	1.0428		3640	22.8	8450	44600	85500	7880	33800	5590	493	4060	528	1670	221	345	30.8	97.6	7.18
JD46B_3_39	1	26.41	3510	9990	2.92056	0.0587	2.67482	0.0397	3.67533	0.004929	2.52059	0.60288	0.001726	2.87703	31.69	0.798775	34.85	1.00265		4920	27.9	8040	36900	71800	7470	32500	4880	478	4160	463	1680	243	339	30.9	111	7.84
JD46B_3_40	4	24.34	4782	11220	2.42072	0.0647	3.5756	0.0357	4.36114	0.004069	2.49692	0.46422	0.001393	2.97998	26.17	0.653445	28.13	0.838269		5880	34.9	7060	36200	88400	9120	35300	5580	537	5560	529	1580	182	200	13	40	2.41
JD46B_3_41	4	25.71	5274	11630	2.27169	0.06	2.5	0.03425	3.34817	0.004131	2.22715	0.62317	0.001412	2.73739	26.57	0.591755	28.52	0.780703		4970	38.1	4200	43700	83600	7840	33900	5370	504	4370	398	920	85	89	5.03	14.5	0.87
JD46B_3_42	2	28.58	6424	12160	1.94553	0.0572	2.57899	0.03509	3.56762	0.004426	2.46509	0.60697	0.001531	2.90309	28.47	0.701812	30.92	0.897636		6030	53.2	4490	40300	86700	8470	34000	5190	573	4010	322	1041	125.3	157.7	13	42.3	2.82
JD46B_13_43	1	42	3061	15050	5.04541	0.064	2.91548	0.0449	3.78442	0.005094	2.41284	0.56954	0.001798	2.82976	32.76	0.790447	36.31	1.02749		5910	34	6610	26300	57400	6150	26500	3840	337	3300	365	1319	187.2	289	23.8	83.8	6.06
JD46B_13_44	2	25.99	4552	10430	2.33209	0.064	3.46636	0.0389	4.34313	0.004395	2.6167	0.57271	0.00161	3.04954	28.27	0.739741	32.52	0.991711		5180	39	3010	34100	62900	6910	28700	4470	414	3150	241	620	71	105	6.7	26.8	2.23
JD46B_13_45	1	23.28	2978	8800	3.02115	0.0666	2.83223	0.0419	3.90018	0.004601	2.68139	0.65768	0.001712	3.12518	29.59	0.793423	34.56	1.08006		3950	27	3770	27800	54600	5340	18800	3440	332	2430	259	820	88	125	10.1	34.7	2.34
JD46B_13_46	2	29.22	4100	11300	2.82885	0.0652	2.87612	0.0409	3.77945	0.004521	2.45197	0.62023	0.001671	2.95636	29.08	0.713032	33.74	0.997478		4660	35.7	4230	34100	63200	6450	29400	4540	412	3310	297	802	98	138	10.5	34.6	2.84
JD46B_13_47	2	24.49	4470	9880	2.25124	0.0691	3.00593	0.043	4.05552	0.00454	2.72243	0.52612	0.001597	3.19496	29.2	0.79495	32.26	1.03069		4160	43.7	970	34400	67000	6390	28200	4050	388	2580	145	275	24.5	28.1	1.68	5.5	0.34
JD46B_13_48		11.22	2225	5250	2.38949	0.0936	3.15691	0.052	4.61107	0.00406	3.36095	0.63099	0.001382	3.63556	26.15	0.878887	27.92	1.01505		2060	19.5	2190	19100	39500	3780	16700	2650	251	1980	195	445	42.7	54.2	3.23	7.5	0.61
JD46B_13_49		7.7	1592	3260	2.07598	0.1074	3.0078	0.0642	4.11588	0.00433	2.80956	0.55213	0.001566	3.32298	27.88	0.783306	31.62	1.05073		1410	13.7	1100	10900	23800	2360	9000	1450	168	1130	92	228	21.7	25.6	1.9	3.7	0.32
JD46B_13_50	2	26.29	4830	10270	2.1561	0.0573	2.43625	0.03653	3.43254	0.004578	2.41806	0.65608	0.00166	2.84712	29.45	0.71212	33.53	0.954638		4550	40.9	1460	36900	72700	6980	28900	4440	428	2660	172	380	36	50	3.4	11.4	0.82
JD46B_14_51		20.24	4748	9490	2.00723	0.066	2.35707	0.0361	3.04885	0.003959	1.93383	0.21729	0.001382	2.45317	25.47	0.492546	27.92	0.684926		4070	39.6	2420	29200	55200	5730	23500	3820	403	2820	237	602	46.1	45	2.09	6.2	0.43
JD46B_14_52	2	46.4	4330	18570	4.29369	0.0572	2.30356	0.03887	3.05738	0.00493	2.01027	0.52047	0.001617	2.49413	31.7	0.637255	32.67	0.814831		6530	69.5	1630	55100	111000	12100	46100	7340	693	5800	465	789	38.2	30.5	0.94	3.64	0.42
JD46B_14_53	3	41.68	6880	18360	2.65604	0.05402	2.10788	0.03256	2.84936	0.004355	1.91721	0.4729	0.001469	2.45485	28.01	0.537009	29.68	0.7286		8800	71.8	3200	58500	119000	13300	45300	7120	756	5470	440	955	61.4	57.2	2.54	5.8	0.61
JD46B_14_54	2	44.16	9840	18680	1.88218	0.05128	1.95131	0.03282	2.69687	0.004624	1.86157	0.49118	0.001522	2.38456	29.74	0.553632	30.73	0.732774		9730	90.5	6420	62900	125000	13300	45900	7920	906	5550	423	1124	127	187	12.1	33.4	1.85
JD46B_14_55	2	50.8	4770	20260	4.22119	0.05732	2.28758	0.03999	3.03245	0.005066	1.99066	0.47133	0.001626	2.43579	32.57	0.648358	32.84	0.799915		7730	75.4	2030	60300	117000	13050	49900	8080	783	6460	545	917	45.3	36.7	1.46	3.61	0.43
JD46B_14_56	2	55.3	7370	22420	2.99581	0.05343	2.2139	0.03533	2.96602	0.004845	1.97381	0.57443	0.001598	2.44371	31.16	0.615041	32.28	0.788831		9170	91.2	2260	64500	123000	13100	48900	8220	821	6260	528	907	46.5	37.7	1.49	5.1	0.58
JD46B_14_57	3	48.32	9190	21800	2.32558	0.05129	2.00193	0.03127	2.75606	0.004438	1.89424	0.39987	0.001437	2.43508	28.54	0.540615	29.02	0.70666		9420	87.3	1230	58600	120000	13170	49200	6900	705	4680	268	357	21.1	23.6	1.04	3.57	0.25
JD46B_14_58	2	49.8	6510	20510	3.09789	0.05376	1.99855	0.03484	2.78158	0.004689	1.93468	0.61748	0.00155	2.40344	30.16	0.583499	31.31	0.752517		8200	84.1	1155	63400	125000	12970	48500	7810	761	5210	382	573	25.8	23.3	0.71	3.37	0.35
* Analysis identification ("JD46B_8_1”) refers to sample number, grain number, and spot number
† Abs. ─ absolute
§ Data in italic were discarded for interpretations because laser spot overlaped with matrix material, inclusions, or more than one chemical domain.

## Sheet: PlotDat1
Source sheet	JD50	20	2.06863e-06	21	0	20	0
Plot name	ProbDens1	20.01	2.43488e-06	22	0	39.99	0
Plot Type	16	20.02	2.86195e-06	22	1
1st free col	9	20.03	3.35924e-06	21	1
Sigma Level	2	20.04	3.93742e-06	21	0
Absolute Errs	TRUE	20.05	4.60866e-06	ErrBox	ErrBox
Symbol Type	1	20.06	5.38678e-06	22	0
Inverse Plot	FALSE	20.07	6.28749e-06	23	0
Color Plot	TRUE	20.08	7.32853e-06	23	1
3D plot	FALSE	20.09	8.53e-06	22	1
Linear	FALSE	20.1	9.91457e-06	22	0
Data Range	AK2:AL53	20.11	1.15078e-05	ErrBox	ErrBox
Filled Symbols	TRUE	20.12	1.33383e-05	23	0
ConcAge	FALSE	20.13	1.54384e-05	24	0
ConcSwap	FALSE	20.14	1.78441e-05	24	1
1st Symbol-row	1	20.15	2.05959e-05	23	1
		20.16	2.37389e-05	23	0
		20.17	2.73232e-05	ErrBox	ErrBox
		20.18	3.14047e-05	24	0
		20.19	3.60454e-05	25	0
		20.2	4.1314e-05	25	1
		20.21	4.72866e-05	24	1
		20.22	5.40468e-05	24	0
		20.23	6.16872e-05	ErrBox	ErrBox
		20.24	7.03092e-05	25	0
		20.25	8.00243e-05	26	0
		20.26	9.09543e-05	26	1
		20.27	0.000103233	25	1
		20.28	0.000117005	25	0
		20.29	0.000132429	ErrBox	ErrBox
		20.3	0.000149677	27	0
		20.31	0.000168934	28	0
		20.32	0.000190403	28	1
		20.33	0.0002143	27	1
		20.34	0.000240858	27	0
		20.35	0.00027033	ErrBox	ErrBox
		20.36	0.000302984	28	0
		20.37	0.000339107	29	0
		20.38	0.000379007	29	1
		20.39	0.000423009	28	1
		20.4	0.000471459	28	0
		20.41	0.000524723	ErrBox	ErrBox
		20.42	0.000583189	29	0
		20.43	0.000647263	30	0
		20.44	0.000717372	30	2
		20.45	0.000793964	29	2
		20.46	0.000877504	29	0
		20.47	0.000968478	ErrBox	ErrBox
		20.48	0.00106739	30	0
		20.49	0.00117476	31	0
		20.5	0.00129112	31	4
		20.51	0.00141702	30	4
		20.52	0.00155303	30	0
		20.53	0.0016997	ErrBox	ErrBox
		20.54	0.00185764	31	0
		20.55	0.0020274	32	0
		20.56	0.00220959	32	6
		20.57	0.00240478	31	6
		20.58	0.00261356	31	0
		20.59	0.00283649	ErrBox	ErrBox
		20.6	0.00307413	32	0
		20.61	0.00332702	33	0
		20.62	0.00359568	33	9
		20.63	0.0038806	32	9
		20.64	0.00418224	32	0
		20.65	0.00450103	ErrBox	ErrBox
		20.66	0.00483734	33	0
		20.67	0.00519152	34	0
		20.68	0.00556383	34	4
		20.69	0.00595451	33	4
		20.7	0.00636371	33	0
		20.71	0.00679152	ErrBox	ErrBox
		20.72	0.00723796	34	0
		20.73	0.00770295	35	0
		20.74	0.00818636	35	4
		20.75	0.00868794	34	4
		20.76	0.00920736	34	0
		20.77	0.00974419	ErrBox	ErrBox
		20.78	0.0102979	35	0
		20.79	0.0108679	36	0
		20.8	0.0114533	36	11
		20.81	0.0120535	35	11
		20.82	0.0126673	35	0
		20.83	0.0132938	ErrBox	ErrBox
		20.84	0.0139317	36	0
		20.85	0.0145799	37	0
		20.86	0.0152369	37	3
		20.87	0.0159012	36	3
		20.88	0.0165713	36	0
		20.89	0.0172455	ErrBox	ErrBox
		20.9	0.017922
		20.91	0.018599
		20.92	0.0192746
		20.93	0.0199468
		20.94	0.0206136
		20.95	0.0212729
		20.96	0.0219225
		20.97	0.0225605
		20.98	0.0231845
		20.99	0.0237925
		21	0.0243822
		21.01	0.0249517
		21.02	0.0254988
		21.03	0.0260214
		21.04	0.0265176
		21.05	0.0269855
		21.06	0.0274232
		21.07	0.0278291
		21.08	0.0282014
		21.09	0.0285389
		21.1	0.0288399
		21.11	0.0291034
		21.12	0.0293282
		21.13	0.0295135
		21.14	0.0296584
		21.15	0.0297623
		21.16	0.0298248
		21.17	0.0298457
		21.18	0.0298248
		21.19	0.0297623
		21.2	0.0296584
		21.21	0.0295135
		21.22	0.0293282
		21.23	0.0291034
		21.24	0.0288399
		21.25	0.0285389
		21.26	0.0282014
		21.27	0.0278291
		21.28	0.0274232
		21.29	0.0269855
		21.3	0.0265176
		21.31	0.0260214
		21.32	0.0254988
		21.33	0.0249517
		21.34	0.0243822
		21.35	0.0237925
		21.36	0.0231845
		21.37	0.0225605
		21.38	0.0219226
		21.39	0.0212729
		21.4	0.0206136
		21.41	0.0199468
		21.42	0.0192747
		21.43	0.0185991
		21.44	0.0179221
		21.45	0.0172456
		21.46	0.0165714
		21.47	0.0159014
		21.48	0.0152371
		21.49	0.0145801
		21.5	0.013932
		21.51	0.0132941
		21.52	0.0126677
		21.53	0.0120539
		21.54	0.0114538
		21.55	0.0108684
		21.56	0.0102986
		21.57	0.00974499
		21.58	0.0092083
		21.59	0.00868904
		21.6	0.00818764
		21.61	0.00770445
		21.62	0.0072397
		21.63	0.00679355
		21.64	0.00636607
		21.65	0.00595725
		21.66	0.00556701
		21.67	0.0051952
		21.68	0.0048416
		21.69	0.00450595
		21.7	0.00418792
		21.71	0.00388714
		21.72	0.00360321
		21.73	0.00333568
		21.74	0.00308408
		21.75	0.0028479
		21.76	0.00262664
		21.77	0.00241975
		21.78	0.0022267
		21.79	0.00204694
		21.8	0.00187991
		21.81	0.00172508
		21.82	0.00158191
		21.83	0.00144984
		21.84	0.00132837
		21.85	0.00121698
		21.86	0.00111519
		21.87	0.00102253
		21.88	0.000938557
		21.89	0.000862838
		21.9	0.000794978
		21.91	0.000734601
		21.92	0.000681364
		21.93	0.000634947
		21.94	0.000595061
		21.95	0.000561449
		21.96	0.000533881
		21.97	0.000512159
		21.98	0.000496115
		21.99	0.000485614
		22	0.000480548
		22.01	0.000480843
		22.02	0.000486455
		22.03	0.000497369
		22.04	0.000513601
		22.05	0.000535197
		22.06	0.00056223
		22.07	0.000594803
		22.08	0.000633046
		22.09	0.000677117
		22.1	0.0007272
		22.11	0.000783502
		22.12	0.000846257
		22.13	0.000915722
		22.14	0.000992175
		22.15	0.00107591
		22.16	0.00116726
		22.17	0.00126655
		22.18	0.00137414
		22.19	0.00149039
		22.2	0.00161568
		22.21	0.00175041
		22.22	0.00189499
		22.23	0.00204981
		22.24	0.00221529
		22.25	0.00239184
		22.26	0.00257988
		22.27	0.00277982
		22.28	0.00299207
		22.29	0.00321702
		22.3	0.00345505
		22.31	0.00370653
		22.32	0.00397182
		22.33	0.00425124
		22.34	0.0045451
		22.35	0.00485368
		22.36	0.00517722
		22.37	0.00551592
		22.38	0.00586997
		22.39	0.0062395
		22.4	0.00662459
		22.41	0.00702527
		22.42	0.00744155
		22.43	0.00787335
		22.44	0.00832057
		22.45	0.00878301
		22.46	0.00926044
		22.47	0.00975257
		22.48	0.010259
		22.49	0.0107794
		22.5	0.0113132
		22.51	0.0118599
		22.52	0.0124188
		22.53	0.0129893
		22.54	0.0135706
		22.55	0.0141619
		22.56	0.0147623
		22.57	0.015371
		22.58	0.0159868
		22.59	0.0166089
		22.6	0.0172361
		22.61	0.0178673
		22.62	0.0185013
		22.63	0.0191369
		22.64	0.019773
		22.65	0.0204082
		22.66	0.0210413
		22.67	0.0216709
		22.68	0.022296
		22.69	0.022915
		22.7	0.0235269
		22.71	0.0241302
		22.72	0.0247239
		22.73	0.0253066
		22.74	0.0258773
		22.75	0.0264348
		22.76	0.0269781
		22.77	0.027506
		22.78	0.0280178
		22.79	0.0285124
		22.8	0.0289891
		22.81	0.0294472
		22.82	0.029886
		22.83	0.0303049
		22.84	0.0307035
		22.85	0.0310814
		22.86	0.0314382
		22.87	0.0317739
		22.88	0.0320882
		22.89	0.0323811
		22.9	0.0326528
		22.91	0.0329034
		22.92	0.0331331
		22.93	0.0333423
		22.94	0.0335315
		22.95	0.033701
		22.96	0.0338515
		22.97	0.0339837
		22.98	0.0340981
		22.99	0.0341956
		23	0.0342769
		23.01	0.034343
		23.02	0.0343945
		23.03	0.0344325
		23.04	0.0344579
		23.05	0.0344715
		23.06	0.0344743
		23.07	0.0344672
		23.08	0.0344512
		23.09	0.034427
		23.1	0.0343957
		23.11	0.0343579
		23.12	0.0343145
		23.13	0.0342663
		23.14	0.0342139
		23.15	0.034158
		23.16	0.0340992
		23.17	0.0340381
		23.18	0.0339751
		23.19	0.0339106
		23.2	0.033845
		23.21	0.0337786
		23.22	0.0337116
		23.23	0.0336442
		23.24	0.0335764
		23.25	0.0335084
		23.26	0.0334401
		23.27	0.0333715
		23.28	0.0333025
		23.29	0.0332328
		23.3	0.0331624
		23.31	0.0330911
		23.32	0.0330185
		23.33	0.0329444
		23.34	0.0328686
		23.35	0.0327908
		23.36	0.0327105
		23.37	0.0326277
		23.38	0.032542
		23.39	0.0324531
		23.4	0.0323608
		23.41	0.0322649
		23.42	0.0321651
		23.43	0.0320614
		23.44	0.0319536
		23.45	0.0318417
		23.46	0.0317256
		23.47	0.0316053
		23.48	0.0314809
		23.49	0.0313527
		23.5	0.0312206
		23.51	0.031085
		23.52	0.0309461
		23.53	0.0308043
		23.54	0.03066
		23.55	0.0305135
		23.56	0.0303654
		23.57	0.0302162
		23.58	0.0300663
		23.59	0.0299165
		23.6	0.0297674
		23.61	0.0296194
		23.62	0.0294734
		23.63	0.0293299
		23.64	0.0291897
		23.65	0.0290533
		23.66	0.0289215
		23.67	0.0287949
		23.68	0.0286741
		23.69	0.0285598
		23.7	0.0284524
		23.71	0.0283525
		23.72	0.0282606
		23.73	0.0281771
		23.74	0.0281024
		23.75	0.0280368
		23.76	0.0279806
		23.77	0.0279338
		23.78	0.0278968
		23.79	0.0278694
		23.8	0.0278517
		23.81	0.0278434
		23.82	0.0278445
		23.83	0.0278547
		23.84	0.0278735
		23.85	0.0279006
		23.86	0.0279355
		23.87	0.0279775
		23.88	0.0280259
		23.89	0.0280802
		23.9	0.0281394
		23.91	0.0282028
		23.92	0.0282693
		23.93	0.0283381
		23.94	0.0284081
		23.95	0.0284783
		23.96	0.0285476
		23.97	0.0286149
		23.98	0.0286791
		23.99	0.028739
		24	0.0287935
		24.01	0.0288415
		24.02	0.0288818
		24.03	0.0289133
		24.04	0.0289349
		24.05	0.0289456
		24.06	0.0289443
		24.07	0.0289301
		24.08	0.0289019
		24.09	0.0288591
		24.1	0.0288006
		24.11	0.0287258
		24.12	0.0286341
		24.13	0.0285247
		24.14	0.0283972
		24.15	0.0282511
		24.16	0.0280861
		24.17	0.0279019
		24.18	0.0276982
		24.19	0.027475
		24.2	0.0272323
		24.21	0.0269701
		24.22	0.0266887
		24.23	0.0263881
		24.24	0.0260688
		24.25	0.0257311
		24.26	0.0253756
		24.27	0.0250028
		24.28	0.0246132
		24.29	0.0242077
		24.3	0.0237869
		24.31	0.0233517
		24.32	0.0229029
		24.33	0.0224414
		24.34	0.0219683
		24.35	0.0214843
		24.36	0.0209907
		24.37	0.0204883
		24.38	0.0199784
		24.39	0.0194619
		24.4	0.0189399
		24.41	0.0184135
		24.42	0.0178839
		24.43	0.017352
		24.44	0.0168189
		24.45	0.0162857
		24.46	0.0157535
		24.47	0.0152231
		24.48	0.0146956
		24.49	0.0141719
		24.5	0.013653
		24.51	0.0131395
		24.52	0.0126325
		24.53	0.0121327
		24.54	0.0116407
		24.55	0.0111573
		24.56	0.0106832
		24.57	0.0102188
		24.58	0.00976481
		24.59	0.00932164
		24.6	0.00888976
		24.61	0.00846955
		24.62	0.00806136
		24.63	0.0076655
		24.64	0.0072822
		24.65	0.00691169
		24.66	0.00655413
		24.67	0.00620966
		24.68	0.00587835
		24.69	0.00556027
		24.7	0.00525543
		24.71	0.00496382
		24.72	0.0046854
		24.73	0.00442012
		24.74	0.00416786
		24.75	0.00392854
		24.76	0.00370201
		24.77	0.00348813
		24.78	0.00328674
		24.79	0.00309767
		24.8	0.00292076
		24.81	0.0027558
		24.82	0.00260262
		24.83	0.00246103
		24.84	0.00233084
		24.85	0.00221187
		24.86	0.00210393
		24.87	0.00200687
		24.88	0.00192051
		24.89	0.00184469
		24.9	0.00177928
		24.91	0.00172415
		24.92	0.00167917
		24.93	0.00164425
		24.94	0.0016193
		24.95	0.00160423
		24.96	0.00159901
		24.97	0.00160357
		24.98	0.00161792
		24.99	0.00164202
		25	0.00167589
		25.01	0.00171957
		25.02	0.00177307
		25.03	0.00183646
		25.04	0.0019098
		25.05	0.00199318
		25.06	0.00208668
		25.07	0.0021904
		25.08	0.00230446
		25.09	0.00242897
		25.1	0.00256405
		25.11	0.00270982
		25.12	0.00286643
		25.13	0.00303401
		25.14	0.00321267
		25.15	0.00340254
		25.16	0.00360375
		25.17	0.00381639
		25.18	0.00404056
		25.19	0.00427637
		25.2	0.00452386
		25.21	0.00478311
		25.22	0.00505415
		25.23	0.00533698
		25.24	0.0056316
		25.25	0.00593797
		25.26	0.00625602
		25.27	0.00658565
		25.28	0.00692674
		25.29	0.00727912
		25.3	0.00764259
		25.31	0.00801692
		25.32	0.00840181
		25.33	0.00879696
		25.34	0.009202
		25.35	0.00961653
		25.36	0.0100401
		25.37	0.0104722
		25.38	0.0109123
		25.39	0.0113599
		25.4	0.0118143
		25.41	0.0122748
		25.42	0.0127407
		25.43	0.0132114
		25.44	0.0136859
		25.45	0.0141634
		25.46	0.0146431
		25.47	0.0151241
		25.48	0.0156055
		25.49	0.0160862
		25.5	0.0165652
		25.51	0.0170416
		25.52	0.0175143
		25.53	0.0179823
		25.54	0.0184444
		25.55	0.0188995
		25.56	0.0193467
		25.57	0.0197848
		25.58	0.0202127
		25.59	0.0206293
		25.6	0.0210335
		25.61	0.0214244
		25.62	0.0218008
		25.63	0.0221617
		25.64	0.0225063
		25.65	0.0228334
		25.66	0.0231423
		25.67	0.023432
		25.68	0.0237017
		25.69	0.0239507
		25.7	0.0241783
		25.71	0.0243837
		25.72	0.0245664
		25.73	0.0247258
		25.74	0.0248616
		25.75	0.0249732
		25.76	0.0250603
		25.77	0.0251228
		25.78	0.0251603
		25.79	0.0251728
		25.8	0.0251603
		25.81	0.0251227
		25.82	0.0250603
		25.83	0.0249731
		25.84	0.0248615
		25.85	0.0247258
		25.86	0.0245663
		25.87	0.0243837
		25.88	0.0241782
		25.89	0.0239507
		25.9	0.0237017
		25.91	0.0234319
		25.92	0.0231422
		25.93	0.0228333
		25.94	0.0225061
		25.95	0.0221616
		25.96	0.0218006
		25.97	0.0214242
		25.98	0.0210333
		25.99	0.020629
		26	0.0202123
		26.01	0.0197844
		26.02	0.0193463
		26.03	0.018899
		26.04	0.0184437
		26.05	0.0179815
		26.06	0.0175135
		26.07	0.0170406
		26.08	0.0165641
		26.09	0.0160849
		26.1	0.015604
		26.11	0.0151224
		26.12	0.0146411
		26.13	0.0141611
		26.14	0.0136832
		26.15	0.0132083
		26.16	0.0127372
		26.17	0.0122707
		26.18	0.0118096
		26.19	0.0113545
		26.2	0.0109062
		26.21	0.0104652
		26.22	0.0100321
		26.23	0.00960735
		26.24	0.00919155
		26.25	0.00878507
		26.26	0.0083883
		26.27	0.00800158
		26.28	0.00762521
		26.29	0.00725944
		26.3	0.0069045
		26.31	0.00656052
		26.32	0.00622766
		26.33	0.005906
		26.34	0.00559561
		26.35	0.00529651
		26.36	0.00500869
		26.37	0.00473211
		26.38	0.00446671
		26.39	0.00421238
		26.4	0.00396903
		26.41	0.00373649
		26.42	0.00351462
		26.43	0.00330323
		26.44	0.00310214
		26.45	0.00291113
		26.46	0.00272998
		26.47	0.00255847
		26.48	0.00239635
		26.49	0.00224338
		26.5	0.00209931
		26.51	0.00196389
		26.52	0.00183686
		26.53	0.00171797
		26.54	0.00160697
		26.55	0.00150361
		26.56	0.00140764
		26.57	0.00131883
		26.58	0.00123694
		26.59	0.00116176
		26.6	0.00109305
		26.61	0.00103062
		26.62	0.000974277
		26.63	0.000923824
		26.64	0.000879092
		26.65	0.000839921
		26.66	0.00080616
		26.67	0.000777676
		26.68	0.000754345
		26.69	0.000736059
		26.7	0.000722724
		26.71	0.000714259
		26.72	0.000710599
		26.73	0.000711691
		26.74	0.000717498
		26.75	0.000727997
		26.76	0.000743179
		26.77	0.000763048
		26.78	0.000787624
		26.79	0.00081694
		26.8	0.00085104
		26.81	0.000889984
		26.82	0.000933845
		26.83	0.000982705
		26.84	0.00103666
		26.85	0.00109582
		26.86	0.00116031
		26.87	0.00123024
		26.88	0.00130577
		26.89	0.00138704
		26.9	0.00147421
		26.91	0.00156745
		26.92	0.00166693
		26.93	0.00177283
		26.94	0.00188534
		26.95	0.00200465
		26.96	0.00213097
		26.97	0.00226449
		26.98	0.00240542
		26.99	0.00255397
		27	0.00271035
		27.01	0.00287476
		27.02	0.00304743
		27.03	0.00322856
		27.04	0.00341835
		27.05	0.00361701
		27.06	0.00382474
		27.07	0.00404174
		27.08	0.0042682
		27.09	0.00450429
		27.1	0.0047502
		27.11	0.00500609
		27.12	0.00527212
		27.13	0.00554843
		27.14	0.00583515
		27.15	0.00613241
		27.16	0.0064403
		27.17	0.00675893
		27.18	0.00708837
		27.19	0.00742867
		27.2	0.00777989
		27.21	0.00814203
		27.22	0.00851511
		27.23	0.00889911
		27.24	0.009294
		27.25	0.0096997
		27.26	0.0101162
		27.27	0.0105433
		27.28	0.0109809
		27.29	0.0114288
		27.3	0.011887
		27.31	0.0123552
		27.32	0.0128331
		27.33	0.0133205
		27.34	0.0138172
		27.35	0.0143229
		27.36	0.0148371
		27.37	0.0153597
		27.38	0.0158901
		27.39	0.0164281
		27.4	0.0169731
		27.41	0.0175248
		27.42	0.0180827
		27.43	0.0186462
		27.44	0.0192149
		27.45	0.0197883
		27.46	0.0203657
		27.47	0.0209466
		27.48	0.0215304
		27.49	0.0221165
		27.5	0.0227042
		27.51	0.023293
		27.52	0.0238821
		27.53	0.0244708
		27.54	0.0250586
		27.55	0.0256446
		27.56	0.0262281
		27.57	0.0268085
		27.58	0.027385
		27.59	0.0279569
		27.6	0.0285235
		27.61	0.0290839
		27.62	0.0296375
		27.63	0.0301835
		27.64	0.0307211
		27.65	0.0312497
		27.66	0.0317684
		27.67	0.0322766
		27.68	0.0327735
		27.69	0.0332584
		27.7	0.0337307
		27.71	0.0341895
		27.72	0.0346343
		27.73	0.0350643
		27.74	0.0354789
		27.75	0.0358776
		27.76	0.0362595
		27.77	0.0366243
		27.78	0.0369712
		27.79	0.0372998
		27.8	0.0376095
		27.81	0.0378998
		27.82	0.0381703
		27.83	0.0384205
		27.84	0.03865
		27.85	0.0388584
		27.86	0.0390453
		27.87	0.0392105
		27.88	0.0393537
		27.89	0.0394745
		27.9	0.0395729
		27.91	0.0396485
		27.92	0.0397013
		27.93	0.0397312
		27.94	0.0397382
		27.95	0.039722
		27.96	0.0396829
		27.97	0.0396209
		27.98	0.039536
		27.99	0.0394284
		28	0.0392982
		28.01	0.0391458
		28.02	0.0389712
		28.03	0.038775
		28.04	0.0385573
		28.05	0.0383186
		28.06	0.0380593
		28.07	0.0377798
		28.08	0.0374807
		28.09	0.0371625
		28.1	0.0368258
		28.11	0.0364711
		28.12	0.0360992
		28.13	0.0357107
		28.14	0.0353063
		28.15	0.0348868
		28.16	0.034453
		28.17	0.0340055
		28.18	0.0335454
		28.19	0.0330734
		28.2	0.0325904
		28.21	0.0320973
		28.22	0.0315951
		28.23	0.0310846
		28.24	0.0305669
		28.25	0.0300428
		28.26	0.0295134
		28.27	0.0289796
		28.28	0.0284425
		28.29	0.027903
		28.3	0.0273621
		28.31	0.0268208
		28.32	0.0262802
		28.33	0.0257411
		28.34	0.0252046
		28.35	0.0246717
		28.36	0.0241432
		28.37	0.0236202
		28.38	0.0231036
		28.39	0.0225943
		28.4	0.0220931
		28.41	0.021601
		28.42	0.0211187
		28.43	0.0206472
		28.44	0.0201871
		28.45	0.0197393
		28.46	0.0193044
		28.47	0.0188832
		28.48	0.0184763
		28.49	0.0180843
		28.5	0.0177079
		28.51	0.0173475
		28.52	0.0170037
		28.53	0.016677
		28.54	0.0163678
		28.55	0.0160765
		28.56	0.0158035
		28.57	0.0155489
		28.58	0.0153132
		28.59	0.0150966
		28.6	0.0148992
		28.61	0.0147212
		28.62	0.0145626
		28.63	0.0144236
		28.64	0.0143042
		28.65	0.0142043
		28.66	0.0141239
		28.67	0.0140629
		28.68	0.0140211
		28.69	0.0139984
		28.7	0.0139946
		28.71	0.0140094
		28.72	0.0140426
		28.73	0.0140937
		28.74	0.0141626
		28.75	0.0142487
		28.76	0.0143518
		28.77	0.0144713
		28.78	0.0146069
		28.79	0.014758
		28.8	0.014924
		28.81	0.0151046
		28.82	0.0152991
		28.83	0.015507
		28.84	0.0157276
		28.85	0.0159605
		28.86	0.0162049
		28.87	0.0164602
		28.88	0.0167258
		28.89	0.0170012
		28.9	0.0172855
		28.91	0.0175781
		28.92	0.0178785
		28.93	0.0181859
		28.94	0.0184997
		28.95	0.0188193
		28.96	0.0191439
		28.97	0.0194729
		28.98	0.0198057
		28.99	0.0201417
		29	0.0204802
		29.01	0.0208206
		29.02	0.0211624
		29.03	0.0215049
		29.04	0.0218476
		29.05	0.02219
		29.06	0.0225314
		29.07	0.0228714
		29.08	0.0232096
		29.09	0.0235454
		29.1	0.0238784
		29.11	0.0242081
		29.12	0.0245342
		29.13	0.0248563
		29.14	0.025174
		29.15	0.025487
		29.16	0.025795
		29.17	0.0260977
		29.18	0.0263949
		29.19	0.0266863
		29.2	0.0269718
		29.21	0.0272511
		29.22	0.0275242
		29.23	0.0277908
		29.24	0.028051
		29.25	0.0283045
		29.26	0.0285514
		29.27	0.0287917
		29.28	0.0290253
		29.29	0.0292522
		29.3	0.0294724
		29.31	0.0296862
		29.32	0.0298934
		29.33	0.0300942
		29.34	0.0302887
		29.35	0.0304771
		29.36	0.0306595
		29.37	0.030836
		29.38	0.0310069
		29.39	0.0311722
		29.4	0.0313323
		29.41	0.0314872
		29.42	0.0316373
		29.43	0.0317828
		29.44	0.0319239
		29.45	0.0320608
		29.46	0.0321939
		29.47	0.0323233
		29.48	0.0324494
		29.49	0.0325724
		29.5	0.0326927
		29.51	0.0328104
		29.52	0.0329258
		29.53	0.0330394
		29.54	0.0331513
		29.55	0.0332619
		29.56	0.0333715
		29.57	0.0334804
		29.58	0.0335888
		29.59	0.0336972
		29.6	0.0338058
		29.61	0.033915
		29.62	0.034025
		29.63	0.0341363
		29.64	0.0342492
		29.65	0.0343639
		29.66	0.0344808
		29.67	0.0346003
		29.68	0.0347227
		29.69	0.0348484
		29.7	0.0349777
		29.71	0.0351111
		29.72	0.0352488
		29.73	0.0353912
		29.74	0.0355388
		29.75	0.0356919
		29.76	0.0358509
		29.77	0.0360162
		29.78	0.0361883
		29.79	0.0363674
		29.8	0.036554
		29.81	0.0367486
		29.82	0.0369515
		29.83	0.0371631
		29.84	0.037384
		29.85	0.0376144
		29.86	0.0378548
		29.87	0.0381057
		29.88	0.0383673
		29.89	0.0386403
		29.9	0.0389248
		29.91	0.0392215
		29.92	0.0395305
		29.93	0.0398524
		29.94	0.0401875
		29.95	0.0405361
		29.96	0.0408987
		29.97	0.0412754
		29.98	0.0416667
		29.99	0.0420728
		30	0.042494
		30.01	0.0429306
		30.02	0.0433827
		30.03	0.0438507
		30.04	0.0443345
		30.05	0.0448345
		30.06	0.0453507
		30.07	0.0458831
		30.08	0.0464319
		30.09	0.046997
		30.1	0.0475784
		30.11	0.048176
		30.12	0.0487899
		30.13	0.0494197
		30.14	0.0500653
		30.15	0.0507266
		30.16	0.0514032
		30.17	0.0520948
		30.18	0.0528012
		30.19	0.0535218
		30.2	0.0542564
		30.21	0.0550044
		30.22	0.0557653
		30.23	0.0565386
		30.24	0.0573237
		30.25	0.0581199
		30.26	0.0589267
		30.27	0.0597433
		30.28	0.060569
		30.29	0.061403
		30.3	0.0622447
		30.31	0.0630931
		30.32	0.0639474
		30.33	0.0648069
		30.34	0.0656706
		30.35	0.0665376
		30.36	0.0674071
		30.37	0.0682781
		30.38	0.0691498
		30.39	0.0700212
		30.4	0.0708914
		30.41	0.0717595
		30.42	0.0726246
		30.43	0.0734858
		30.44	0.0743423
		30.45	0.0751931
		30.46	0.0760375
		30.47	0.0768746
		30.48	0.0777037
		30.49	0.0785239
		30.5	0.0793345
		30.51	0.080135
		30.52	0.0809245
		30.53	0.0817026
		30.54	0.0824686
		30.55	0.0832221
		30.56	0.0839626
		30.57	0.0846896
		30.58	0.0854028
		30.59	0.086102
		30.6	0.0867868
		30.61	0.0874571
		30.62	0.0881127
		30.63	0.0887536
		30.64	0.0893798
		30.65	0.0899912
		30.66	0.090588
		30.67	0.0911704
		30.68	0.0917386
		30.69	0.0922929
		30.7	0.0928335
		30.71	0.093361
		30.72	0.0938757
		30.73	0.0943781
		30.74	0.0948688
		30.75	0.0953483
		30.76	0.0958173
		30.77	0.0962765
		30.78	0.0967266
		30.79	0.0971683
		30.8	0.0976023
		30.81	0.0980296
		30.82	0.0984509
		30.83	0.098867
		30.84	0.0992789
		30.85	0.0996873
		30.86	0.100093
		30.87	0.100498
		30.88	0.100901
		30.89	0.101305
		30.9	0.101709
		30.91	0.102116
		30.92	0.102525
		30.93	0.102937
		30.94	0.103354
		30.95	0.103776
		30.96	0.104203
		30.97	0.104637
		30.98	0.105078
		30.99	0.105527
		31	0.105984
		31.01	0.106449
		31.02	0.106924
		31.03	0.107408
		31.04	0.107902
		31.05	0.108407
		31.06	0.108921
		31.07	0.109447
		31.08	0.109982
		31.09	0.110529
		31.1	0.111086
		31.11	0.111653
		31.12	0.112231
		31.13	0.112819
		31.14	0.113417
		31.15	0.114024
		31.16	0.114641
		31.17	0.115265
		31.18	0.115898
		31.19	0.116538
		31.2	0.117185
		31.21	0.117838
		31.22	0.118496
		31.23	0.119159
		31.24	0.119826
		31.25	0.120495
		31.26	0.121166
		31.27	0.121838
		31.28	0.122511
		31.29	0.123182
		31.3	0.123851
		31.31	0.124517
		31.32	0.125179
		31.33	0.125836
		31.34	0.126487
		31.35	0.127131
		31.36	0.127767
		31.37	0.128393
		31.38	0.129009
		31.39	0.129614
		31.4	0.130206
		31.41	0.130786
		31.42	0.131351
		31.43	0.131902
		31.44	0.132436
		31.45	0.132955
		31.46	0.133455
		31.47	0.133938
		31.48	0.134402
		31.49	0.134847
		31.5	0.135272
		31.51	0.135677
		31.52	0.136061
		31.53	0.136424
		31.54	0.136766
		31.55	0.137086
		31.56	0.137384
		31.57	0.13766
		31.58	0.137914
		31.59	0.138146
		31.6	0.138356
		31.61	0.138544
		31.62	0.138711
		31.63	0.138857
		31.64	0.138982
		31.65	0.139086
		31.66	0.13917
		31.67	0.139234
		31.68	0.13928
		31.69	0.139307
		31.7	0.139317
		31.71	0.13931
		31.72	0.139287
		31.73	0.139248
		31.74	0.139195
		31.75	0.139129
		31.76	0.13905
		31.77	0.13896
		31.78	0.138859
		31.79	0.138749
		31.8	0.13863
		31.81	0.138504
		31.82	0.138372
		31.83	0.138235
		31.84	0.138095
		31.85	0.137951
		31.86	0.137807
		31.87	0.137662
		31.88	0.137517
		31.89	0.137375
		31.9	0.137236
		31.91	0.137101
		31.92	0.136972
		31.93	0.136849
		31.94	0.136734
		31.95	0.136628
		31.96	0.136532
		31.97	0.136446
		31.98	0.136372
		31.99	0.136311
		32	0.136263
		32.01	0.13623
		32.02	0.136212
		32.03	0.13621
		32.04	0.136225
		32.05	0.136257
		32.06	0.136308
		32.07	0.136377
		32.08	0.136465
		32.09	0.136573
		32.1	0.136701
		32.11	0.13685
		32.12	0.137019
		32.13	0.137209
		32.14	0.13742
		32.15	0.137652
		32.16	0.137905
		32.17	0.13818
		32.18	0.138475
		32.19	0.138791
		32.2	0.139128
		32.21	0.139485
		32.22	0.139862
		32.23	0.140258
		32.24	0.140673
		32.25	0.141107
		32.26	0.141558
		32.27	0.142026
		32.28	0.142511
		32.29	0.143011
		32.3	0.143525
		32.31	0.144053
		32.32	0.144594
		32.33	0.145147
		32.34	0.14571
		32.35	0.146282
		32.36	0.146863
		32.37	0.14745
		32.38	0.148043
		32.39	0.148641
		32.4	0.149242
		32.41	0.149844
		32.42	0.150447
		32.43	0.151049
		32.44	0.151648
		32.45	0.152243
		32.46	0.152832
		32.47	0.153415
		32.48	0.153989
		32.49	0.154553
		32.5	0.155106
		32.51	0.155646
		32.52	0.156172
		32.53	0.156682
		32.54	0.157174
		32.55	0.157648
		32.56	0.158101
		32.57	0.158533
		32.58	0.158943
		32.59	0.159328
		32.6	0.159687
		32.61	0.16002
		32.62	0.160325
		32.63	0.160601
		32.64	0.160848
		32.65	0.161062
		32.66	0.161245
		32.67	0.161395
		32.68	0.161511
		32.69	0.161592
		32.7	0.161638
		32.71	0.161648
		32.72	0.161621
		32.73	0.161557
		32.74	0.161455
		32.75	0.161316
		32.76	0.161137
		32.77	0.160921
		32.78	0.160665
		32.79	0.160371
		32.8	0.160038
		32.81	0.159667
		32.82	0.159256
		32.83	0.158808
		32.84	0.158321
		32.85	0.157796
		32.86	0.157235
		32.87	0.156636
		32.88	0.156001
		32.89	0.155331
		32.9	0.154625
		32.91	0.153886
		32.92	0.153113
		32.93	0.152308
		32.94	0.151472
		32.95	0.150604
		32.96	0.149708
		32.97	0.148783
		32.98	0.147831
		32.99	0.146853
		33	0.14585
		33.01	0.144823
		33.02	0.143774
		33.03	0.142705
		33.04	0.141615
		33.05	0.140508
		33.06	0.139383
		33.07	0.138243
		33.08	0.137089
		33.09	0.135923
		33.1	0.134745
		33.11	0.133558
		33.12	0.132362
		33.13	0.13116
		33.14	0.129952
		33.15	0.12874
		33.16	0.127525
		33.17	0.12631
		33.18	0.125094
		33.19	0.123881
		33.2	0.12267
		33.21	0.121463
		33.22	0.120263
		33.23	0.119069
		33.24	0.117883
		33.25	0.116706
		33.26	0.11554
		33.27	0.114386
		33.28	0.113244
		33.29	0.112116
		33.3	0.111003
		33.31	0.109906
		33.32	0.108825
		33.33	0.107762
		33.34	0.106718
		33.35	0.105693
		33.36	0.104688
		33.37	0.103704
		33.38	0.102741
		33.39	0.1018
		33.4	0.100882
		33.41	0.0999875
		33.42	0.0991162
		33.43	0.098269
		33.44	0.0974463
		33.45	0.0966483
		33.46	0.0958753
		33.47	0.0951277
		33.48	0.0944055
		33.49	0.093709
		33.5	0.0930382
		33.51	0.0923932
		33.52	0.0917741
		33.53	0.0911807
		33.54	0.0906131
		33.55	0.0900711
		33.56	0.0895547
		33.57	0.0890635
		33.58	0.0885974
		33.59	0.0881562
		33.6	0.0877396
		33.61	0.0873472
		33.62	0.0869788
		33.63	0.0866339
		33.64	0.0863122
		33.65	0.0860132
		33.66	0.0857365
		33.67	0.0854816
		33.68	0.085248
		33.69	0.0850352
		33.7	0.0848427
		33.71	0.08467
		33.72	0.0845164
		33.73	0.0843814
		33.74	0.0842644
		33.75	0.0841649
		33.76	0.0840822
		33.77	0.0840156
		33.78	0.0839646
		33.79	0.0839286
		33.8	0.0839069
		33.81	0.0838988
		33.82	0.0839039
		33.83	0.0839213
		33.84	0.0839505
		33.85	0.0839909
		33.86	0.0840418
		33.87	0.0841027
		33.88	0.0841729
		33.89	0.0842517
		33.9	0.0843386
		33.91	0.0844331
		33.92	0.0845344
		33.93	0.0846421
		33.94	0.0847556
		33.95	0.0848743
		33.96	0.0849978
		33.97	0.0851254
		33.98	0.0852567
		33.99	0.0853912
		34	0.0855284
		34.01	0.0856679
		34.02	0.0858091
		34.03	0.0859517
		34.04	0.0860953
		34.05	0.0862394
		34.06	0.0863837
		34.07	0.0865278
		34.08	0.0866714
		34.09	0.0868142
		34.1	0.0869559
		34.11	0.0870961
		34.12	0.0872347
		34.13	0.0873713
		34.14	0.0875058
		34.15	0.087638
		34.16	0.0877676
		34.17	0.0878946
		34.18	0.0880188
		34.19	0.08814
		34.2	0.0882583
		34.21	0.0883734
		34.22	0.0884854
		34.23	0.0885943
		34.24	0.0887
		34.25	0.0888026
		34.26	0.0889021
		34.27	0.0889985
		34.28	0.0890921
		34.29	0.0891827
		34.3	0.0892707
		34.31	0.0893562
		34.32	0.0894393
		34.33	0.0895203
		34.34	0.0895994
		34.35	0.0896769
		34.36	0.0897529
		34.37	0.0898279
		34.38	0.0899022
		34.39	0.089976
		34.4	0.0900498
		34.41	0.0901241
		34.42	0.0901991
		34.43	0.0902753
		34.44	0.0903532
		34.45	0.0904333
		34.46	0.0905161
		34.47	0.0906022
		34.48	0.090692
		34.49	0.0907861
		34.5	0.0908852
		34.51	0.0909898
		34.52	0.0911006
		34.53	0.0912182
		34.54	0.0913433
		34.55	0.0914765
		34.56	0.0916186
		34.57	0.0917702
		34.58	0.0919321
		34.59	0.092105
		34.6	0.0922896
		34.61	0.0924867
		34.62	0.092697
		34.63	0.0929214
		34.64	0.0931605
		34.65	0.0934151
		34.66	0.0936861
		34.67	0.0939741
		34.68	0.09428
		34.69	0.0946046
		34.7	0.0949485
		34.71	0.0953125
		34.72	0.0956974
		34.73	0.096104
		34.74	0.0965328
		34.75	0.0969847
		34.76	0.0974604
		34.77	0.0979604
		34.78	0.0984854
		34.79	0.0990362
		34.8	0.0996132
		34.81	0.100217
		34.82	0.100848
		34.83	0.101507
		34.84	0.102195
		34.85	0.102911
		34.86	0.103656
		34.87	0.104431
		34.88	0.105236
		34.89	0.106071
		34.9	0.106937
		34.91	0.107833
		34.92	0.10876
		34.93	0.109717
		34.94	0.110706
		34.95	0.111725
		34.96	0.112775
		34.97	0.113856
		34.98	0.114967
		34.99	0.116108
		35	0.117279
		35.01	0.11848
		35.02	0.11971
		35.03	0.120968
		35.04	0.122255
		35.05	0.123569
		35.06	0.12491
		35.07	0.126277
		35.08	0.127669
		35.09	0.129085
		35.1	0.130525
		35.11	0.131988
		35.12	0.133472
		35.13	0.134976
		35.14	0.1365
		35.15	0.138041
		35.16	0.1396
		35.17	0.141173
		35.18	0.142761
		35.19	0.144361
		35.2	0.145973
		35.21	0.147594
		35.22	0.149223
		35.23	0.150858
		35.24	0.152498
		35.25	0.154141
		35.26	0.155786
		35.27	0.15743
		35.28	0.159071
		35.29	0.160709
		35.3	0.16234
		35.31	0.163964
		35.32	0.165578
		35.33	0.16718
		35.34	0.168769
		35.35	0.170342
		35.36	0.171898
		35.37	0.173435
		35.38	0.17495
		35.39	0.176442
		35.4	0.177909
		35.41	0.179349
		35.42	0.18076
		35.43	0.18214
		35.44	0.183488
		35.45	0.184801
		35.46	0.186078
		35.47	0.187316
		35.48	0.188516
		35.49	0.189673
		35.5	0.190788
		35.51	0.191858
		35.52	0.192882
		35.53	0.193858
		35.54	0.194786
		35.55	0.195662
		35.56	0.196487
		35.57	0.197259
		35.58	0.197977
		35.59	0.19864
		35.6	0.199246
		35.61	0.199795
		35.62	0.200285
		35.63	0.200717
		35.64	0.201089
		35.65	0.2014
		35.66	0.20165
		35.67	0.201839
		35.68	0.201966
		35.69	0.20203
		35.7	0.202032
		35.71	0.201971
		35.72	0.201847
		35.73	0.201661
		35.74	0.201411
		35.75	0.201099
		35.76	0.200724
		35.77	0.200287
		35.78	0.199789
		35.79	0.199229
		35.8	0.198608
		35.81	0.197927
		35.82	0.197187
		35.83	0.196388
		35.84	0.195531
		35.85	0.194617
		35.86	0.193647
		35.87	0.192622
		35.88	0.191543
		35.89	0.190412
		35.9	0.189228
		35.91	0.187995
		35.92	0.186712
		35.93	0.185382
		35.94	0.184006
		35.95	0.182585
		35.96	0.18112
		35.97	0.179614
		35.98	0.178068
		35.99	0.176482
		36	0.17486
		36.01	0.173202
		36.02	0.17151
		36.03	0.169787
		36.04	0.168032
		36.05	0.166249
		36.06	0.164439
		36.07	0.162603
		36.08	0.160743
		36.09	0.158862
		36.1	0.15696
		36.11	0.155039
		36.12	0.153102
		36.13	0.151149
		36.14	0.149182
		36.15	0.147203
		36.16	0.145214
		36.17	0.143216
		36.18	0.14121
		36.19	0.139199
		36.2	0.137184
		36.21	0.135165
		36.22	0.133145
		36.23	0.131125
		36.24	0.129107
		36.25	0.127091
		36.26	0.125079
		36.27	0.123072
		36.28	0.121072
		36.29	0.11908
		36.3	0.117096
		36.31	0.115122
		36.32	0.113158
		36.33	0.111207
		36.34	0.109268
		36.35	0.107343
		36.36	0.105433
		36.37	0.103538
		36.38	0.101659
		36.39	0.0997968
		36.4	0.0979522
		36.41	0.0961258
		36.42	0.0943181
		36.43	0.0925298
		36.44	0.0907612
		36.45	0.089013
		36.46	0.0872854
		36.47	0.0855789
		36.48	0.0838939
		36.49	0.0822306
		36.5	0.0805892
		36.51	0.0789702
		36.52	0.0773735
		36.53	0.0757995
		36.54	0.0742482
		36.55	0.0727197
		36.56	0.0712142
		36.57	0.0697316
		36.58	0.0682719
		36.59	0.0668352
		36.6	0.0654214
		36.61	0.0640305
		36.62	0.0626623
		36.63	0.0613168
		36.64	0.0599938
		36.65	0.0586933
		36.66	0.0574149
		36.67	0.0561586
		36.68	0.0549242
		36.69	0.0537115
		36.7	0.0525202
		36.71	0.0513501
		36.72	0.050201
		36.73	0.0490726
		36.74	0.0479647
		36.75	0.046877
		36.76	0.0458093
		36.77	0.0447612
		36.78	0.0437325
		36.79	0.042723
		36.8	0.0417322
		36.81	0.04076
		36.82	0.0398061
		36.83	0.0388701
		36.84	0.0379517
		36.85	0.0370508
		36.86	0.036167
		36.87	0.0353
		36.88	0.0344495
		36.89	0.0336153
		36.9	0.0327971
		36.91	0.0319946
		36.92	0.0312076
		36.93	0.0304357
		36.94	0.0296788
		36.95	0.0289365
		36.96	0.0282087
		36.97	0.027495
		36.98	0.0267953
		36.99	0.0261092
		37	0.0254367
		37.01	0.0247774
		37.02	0.0241311
		37.03	0.0234977
		37.04	0.0228768
		37.05	0.0222684
		37.06	0.0216722
		37.07	0.021088
		37.08	0.0205156
		37.09	0.0199549
		37.1	0.0194056
		37.11	0.0188676
		37.12	0.0183408
		37.13	0.0178249
		37.14	0.0173198
		37.15	0.0168254
		37.16	0.0163414
		37.17	0.0158678
		37.18	0.0154043
		37.19	0.0149509
		37.2	0.0145074
		37.21	0.0140737
		37.22	0.0136495
		37.23	0.0132349
		37.24	0.0128296
		37.25	0.0124336
		37.26	0.0120466
		37.27	0.0116686
		37.28	0.0112995
		37.29	0.0109391
		37.3	0.0105872
		37.31	0.0102439
		37.32	0.00990893
		37.33	0.00958219
		37.34	0.00926356
		37.35	0.00895293
		37.36	0.00865019
		37.37	0.00835521
		37.38	0.00806788
		37.39	0.00778808
		37.4	0.00751569
		37.41	0.00725059
		37.42	0.00699268
		37.43	0.00674183
		37.44	0.00649793
		37.45	0.00626085
		37.46	0.00603049
		37.47	0.00580673
		37.48	0.00558945
		37.49	0.00537853
		37.5	0.00517386
		37.51	0.00497532
		37.52	0.00478278
		37.53	0.00459616
		37.54	0.00441531
		37.55	0.00424014
		37.56	0.00407051
		37.57	0.00390632
		37.58	0.00374745
		37.59	0.00359379
		37.6	0.00344521
		37.61	0.00330161
		37.62	0.00316287
		37.63	0.00302888
		37.64	0.00289952
		37.65	0.00277469
		37.66	0.00265427
		37.67	0.00253816
		37.68	0.00242624
		37.69	0.0023184
		37.7	0.00221454
		37.71	0.00211455
		37.72	0.00201833
		37.73	0.00192575
		37.74	0.00183675
		37.75	0.00175121
		37.76	0.00166902
		37.77	0.00159009
		37.78	0.00151432
		37.79	0.00144161
		37.8	0.00137186
		37.81	0.001305
		37.82	0.00124092
		37.83	0.00117953
		37.84	0.00112074
		37.85	0.00106448
		37.86	0.00101064
		37.87	0.000959159
		37.88	0.000909943
		37.89	0.000862917
		37.9	0.000818
		37.91	0.000775118
		37.92	0.000734195
		37.93	0.00069514
		37.94	0.000657922
		37.95	0.00062245
		37.96	0.000588657
		37.97	0.000556478
		37.98	0.000525849
		37.99	0.000496708
		38	0.000468994
		38.01	0.00044265
		38.02	0.000417618
		38.03	0.000393825
		38.04	0.000371257
		38.05	0.000349823
		38.06	0.000329494
		38.07	0.00031022
		38.08	0.000291974
		38.09	0.000274671
		38.1	0.000258307
		38.11	0.00024282
		38.12	0.000228148
		38.13	0.000214295
		38.14	0.000201201
		38.15	0.00018883
		38.16	0.000177147
		38.17	0.000166118
		38.18	0.000155713
		38.19	0.000145899
		38.2	0.00013663
		38.21	0.000127915
		38.22	0.000119706
		38.23	0.000111978
		38.24	0.000104706
		38.25	9.78651e-05
		38.26	9.14337e-05
		38.27	8.53896e-05
		38.28	7.97121e-05
		38.29	7.43812e-05
		38.3	6.93781e-05
		38.31	6.46847e-05
		38.32	6.02638e-05
		38.33	5.61412e-05
		38.34	5.22787e-05
		38.35	4.86618e-05
		38.36	4.52762e-05
		38.37	4.21085e-05
		38.38	3.91462e-05
		38.39	3.6377e-05
		38.4	3.37896e-05
		38.41	3.13731e-05
		38.42	2.90986e-05
		38.43	2.69957e-05
		38.44	2.50342e-05
		38.45	2.32056e-05
		38.46	2.15014e-05
		38.47	1.99141e-05
		38.48	1.84361e-05
		38.49	1.70607e-05
		38.5	1.57812e-05
		38.51	1.45916e-05
		38.52	1.34859e-05
		38.53	1.24588e-05
		38.54	1.1505e-05
		38.55	1.06198e-05
		38.56	9.79857e-06
		38.57	9.03702e-06
		38.58	8.33113e-06
		38.59	7.67714e-06
		38.6	7.0715e-06
		38.61	6.51089e-06
		38.62	5.99218e-06
		38.63	5.51247e-06
		38.64	5.06901e-06
		38.65	4.65926e-06
		38.66	4.28082e-06
		38.67	3.93145e-06
		38.68	3.60906e-06
		38.69	3.31171e-06
		38.7	3.03756e-06
		38.71	2.78493e-06
		38.72	2.55223e-06
		38.73	2.33798e-06
		38.74	2.14081e-06
		38.75	1.95943e-06
		38.76	1.79266e-06
		38.77	1.63938e-06
		38.78	1.49858e-06
		38.79	1.36928e-06
		38.8	1.23076e-06
		38.81	1.12397e-06
		38.82	1.026e-06
		38.83	9.36171e-07
		38.84	8.53837e-07
		38.85	7.78409e-07
		38.86	7.09338e-07
		38.87	6.46117e-07
		38.88	5.88277e-07
		38.89	5.35384e-07
		38.9	4.87037e-07
		38.91	4.42864e-07
		38.92	4.02525e-07
		38.93	3.65702e-07
		38.94	3.32104e-07
		38.95	3.01463e-07
		38.96	2.73531e-07
		38.97	2.4808e-07
		38.98	2.249e-07
		38.99	2.03799e-07
		39	1.84597e-07
		39.01	1.67133e-07
		39.02	1.51255e-07
		39.03	1.36827e-07
		39.04	1.23722e-07
		39.05	1.11824e-07
		39.06	1.01026e-07
		39.07	9.1232e-08
		39.08	8.23518e-08
		39.09	7.43038e-08
		39.1	6.70135e-08
		39.11	6.04124e-08
		39.12	5.44381e-08
		39.13	4.90334e-08
		39.14	4.41463e-08
		39.15	3.97291e-08
		39.16	3.57385e-08
		39.17	3.21349e-08
		39.18	2.88821e-08
		39.19	2.59475e-08
		39.2	2.33009e-08
		39.21	2.09153e-08
		39.22	0
		39.23	0
		39.24	0
		39.25	0
		39.26	0
		39.27	0
		39.28	0
		39.29	0
		39.3	0
		39.31	0
		39.32	0
		39.33	0
		39.34	0
		39.35	0
		39.36	0
		39.37	0
		39.38	0
		39.39	0
		39.4	0
		39.41	0
		39.42	0
		39.43	0
		39.44	0
		39.45	0
		39.46	0
		39.47	0
		39.48	0
		39.49	0
		39.5	0
		39.51	0
		39.52	0
		39.53	0
		39.54	0
		39.55	0
		39.56	0
		39.57	0
		39.58	0
		39.59	0
		39.6	0
		39.61	0
		39.62	0
		39.63	0
		39.64	0
		39.65	0
		39.66	0
		39.67	0
		39.68	0
		39.69	0
		39.7	0
		39.71	0
		39.72	0
		39.73	0
		39.74	0
		39.75	0
		39.76	0
		39.77	0
		39.78	0
		39.79	0
		39.8	0
		39.81	0
		39.82	0
		39.83	0
		39.84	0
		39.85	0
		39.86	0
		39.87	0
		39.88	0
		39.89	0
		39.9	0
		39.91	0
		39.92	0
		39.93	0
		39.94	0
		39.95	0
		39.96	0
		39.97	0
		39.98	0
		39.99	0
[truncated: 1 more rows]
